# Supplementary material for: Structural Characterization and Interaction with RCA120 of a Highly Sulfated Keratan Sulfate from Blue Shark (Prionace glauca) Cartilage
Source: Mar Drugs. 2018 Apr 14;16(4):128. doi: 10.3390/md16040128 (PMC5923415; doi:10.3390/md16040128)
Supplement: Supplementary file 1 [file marinedrugs-16-00128-s001.pdf]

# Supplementary Materials: Structural Characterization and Interaction with RCA<sub>120</sub> of a Highly Sulfated Keratan Sulfate from Blue Shark (*Prionace glauca*) Cartilage

**Table S1** Physicochemical properties analysis of KS and CS.

| Sample | Yield (%) | Uronic acid (%) | Sulfate (%) | Protein (%) | Molecular weight (kDa) |                      |                                    | Monosaccharide composition (%) |      |      |      |
|--------|-----------|-----------------|-------------|-------------|------------------------|----------------------|------------------------------------|--------------------------------|------|------|------|
|        |           |                 |             |             | <i>M<sub>w</sub></i>   | <i>M<sub>n</sub></i> | <i>M<sub>w</sub>/M<sub>n</sub></i> | GlcN                           | GlcA | Gal  | GalN |
| KS     | 21.8      | 3.5             | 26.1        | 6.0         | 45.98                  | 34.62                | 1.33                               | 49.4                           | —    | 50.6 | —    |
| CS     | 46.9      | 36.8            | 24.0        | --          | 38.49                  | 32.49                | 1.18                               | —                              | 40.2 | —    | 59.8 |

**Table S2** Disaccharides composition of CS.

| CS/DS disaccharides | 0S   | 6S    | 4S    | 2,6S  | 2,4S |
|---------------------|------|-------|-------|-------|------|
| Content%            | 1.08 | 39.54 | 25.21 | 32.60 | 1.58 |

**Table S3** Summary of kinetic data of shark KS and egg KS-RCA<sub>120</sub> interactions.

| Interactions | <i>k<sub>a</sub></i> (1/MS) | <i>k<sub>d</sub></i> (1/S) | <i>K<sub>D</sub></i> (M) |
|--------------|-----------------------------|----------------------------|--------------------------|
| Shark KS     | 4.42×10 <sup>4</sup>        | 5.41×10 <sup>-3</sup>      | 1.22×10 <sup>-7</sup>    |
| Egg KS       | 3.63×10 <sup>4</sup>        | 4.98×10 <sup>-3</sup>      | 1.37×10 <sup>-7</sup>    |

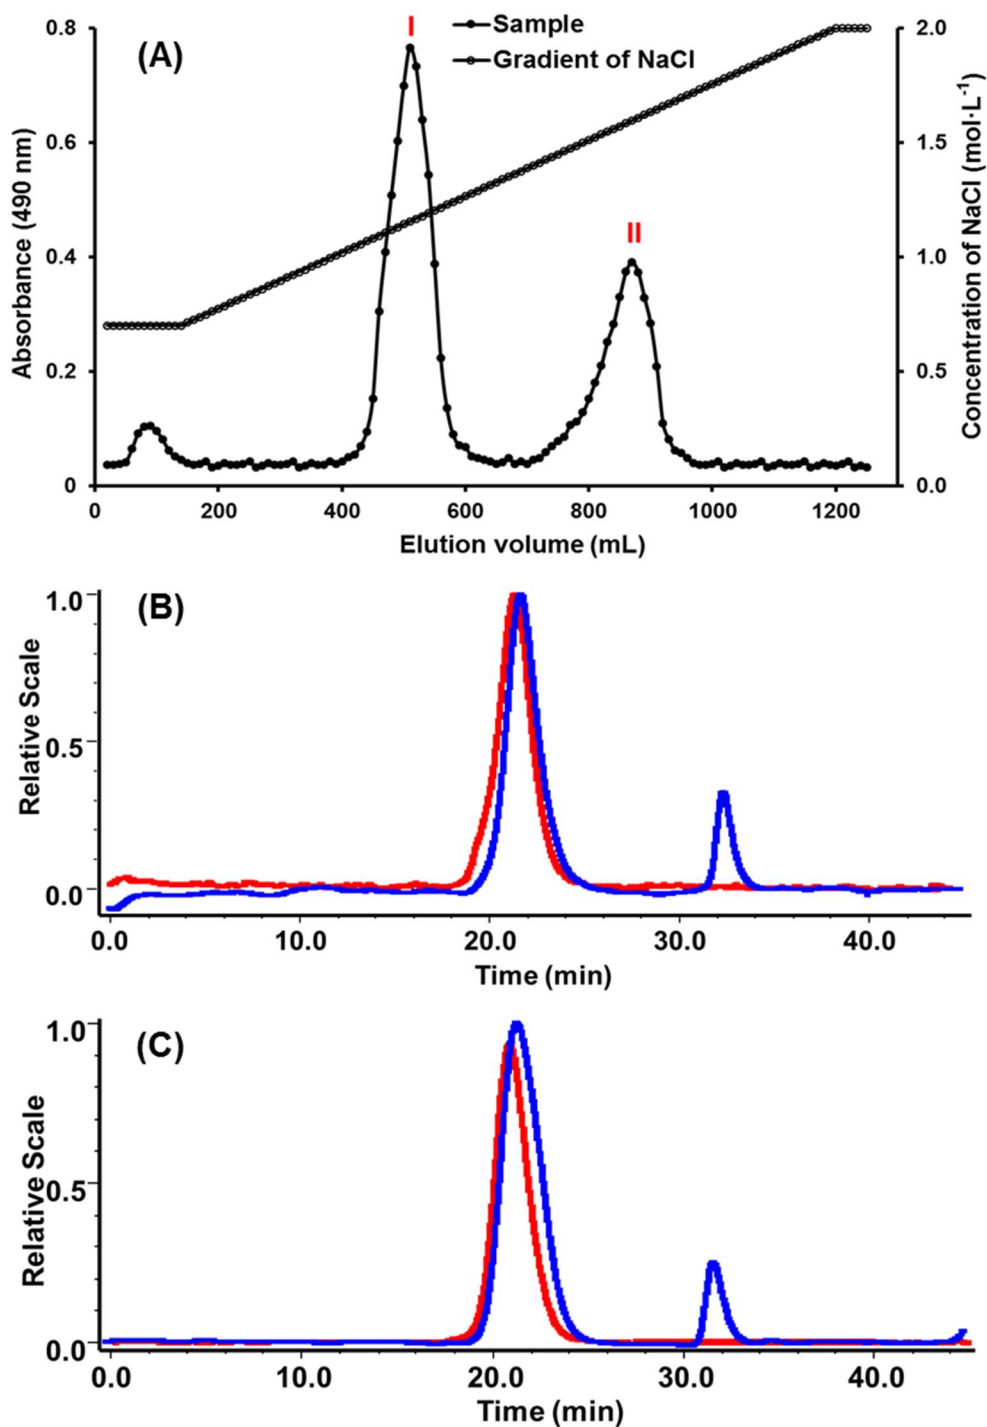

**Figure S1.** Elution profile of GAGs from *Prionace glauca* cartilage on a QFF ion-exchange column (A). Peak I was eluted with 1.2 M NaCl solution, while Peak II was eluted with 1.6 M NaCl solution. Molecular weight determination of CS (B) and KS (C). The x-axes correspond to elution time and the y-axes correspond to the signals detected using RID (Blue line) and MALLS (Red line).

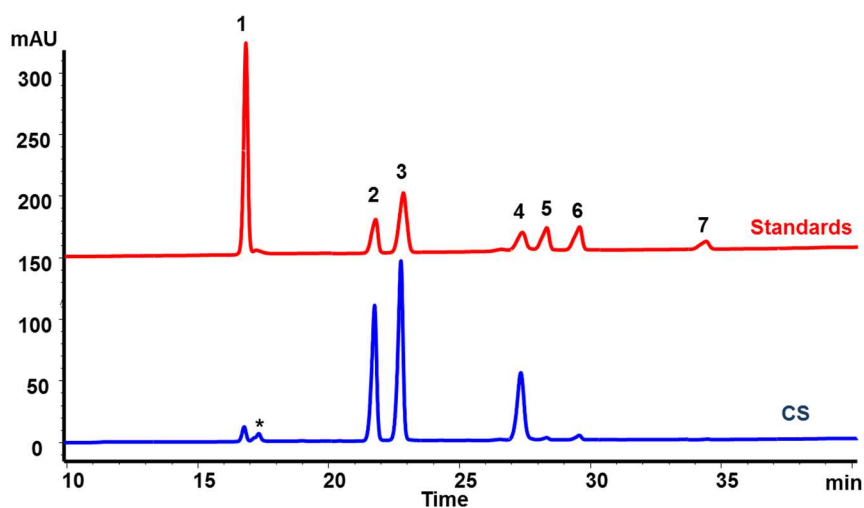

**Figure S2.** Separation chromatography of CS disaccharides analysis on SAX-HPLC. The red line represents seven disaccharide standards. Numbered peaks correspond to known disaccharide standards as follows: 1,  $\Delta\text{Di-0S}$ ; 2,  $\Delta\text{Di-6S}$ ; 3,  $\Delta\text{Di-4S}$ ; 4,  $\Delta\text{Di-2,6S}$ ; 5,  $\Delta\text{Di-4,6S}$ ; 6,  $\Delta\text{Di-2,4S}$ ; 7,  $\Delta\text{Di-2,4,6S}$ ; Peaks labeled with “\*” were contaminants from the reaction system.

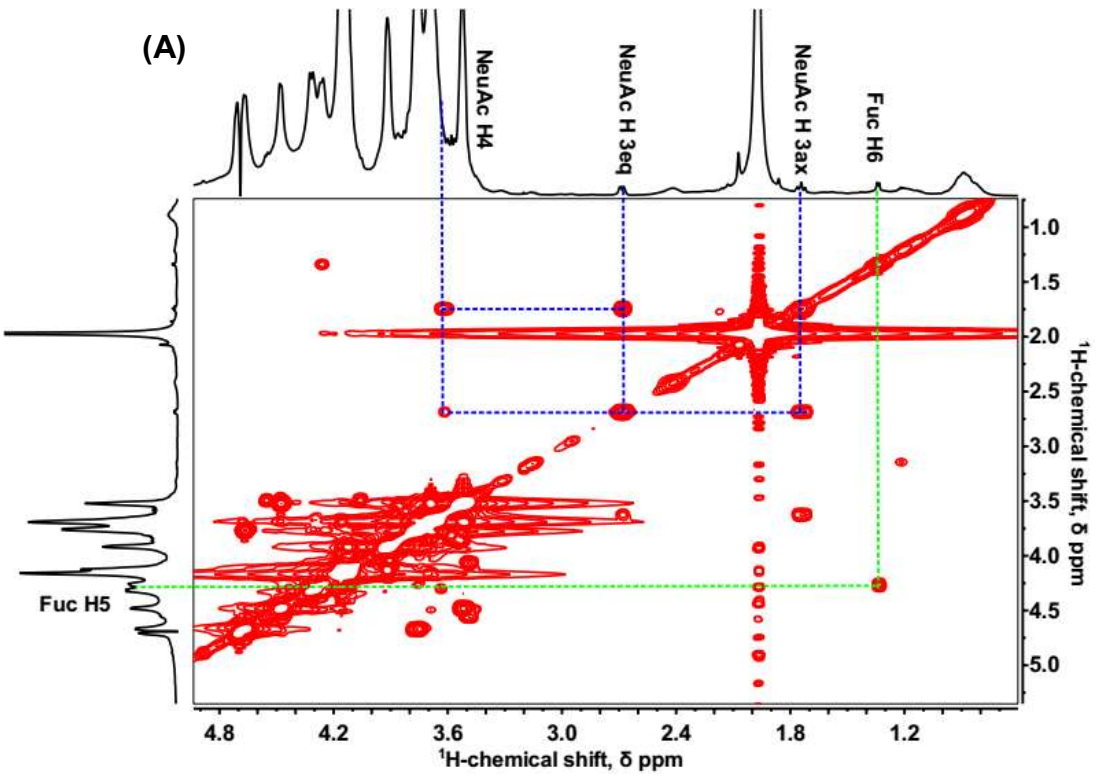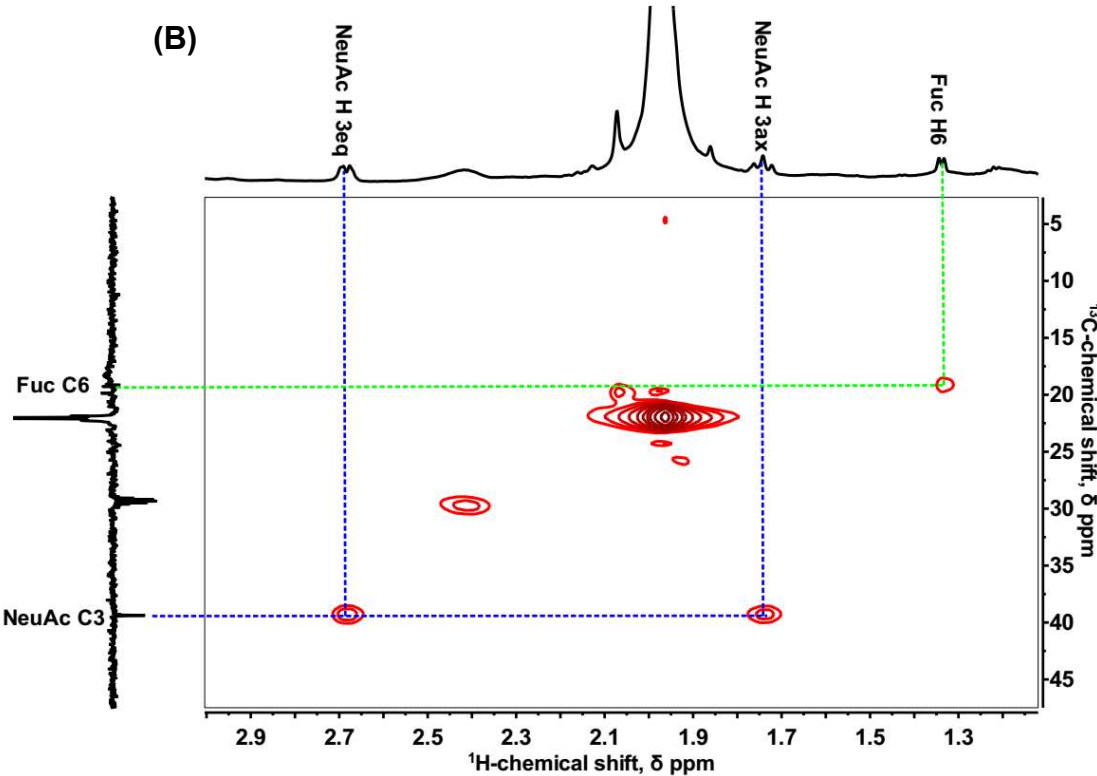

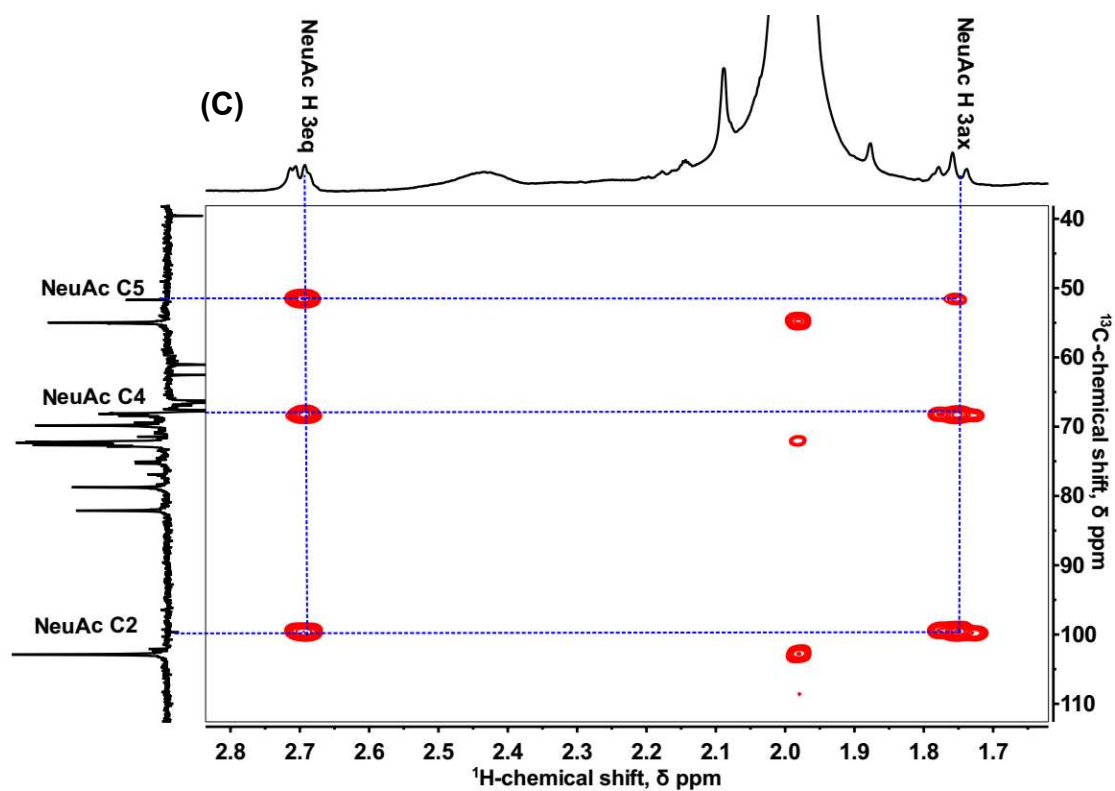

**Figure S3.** Signals of NeuAc and fucose in KS determined by 2D  $^1\text{H}$ - $^1\text{H}$ - COSY (A),  $^1\text{H}$ - $^{13}\text{C}$  HSQC (B) and  $^1\text{H}$ - $^{13}\text{C}$ - HMBC (C).

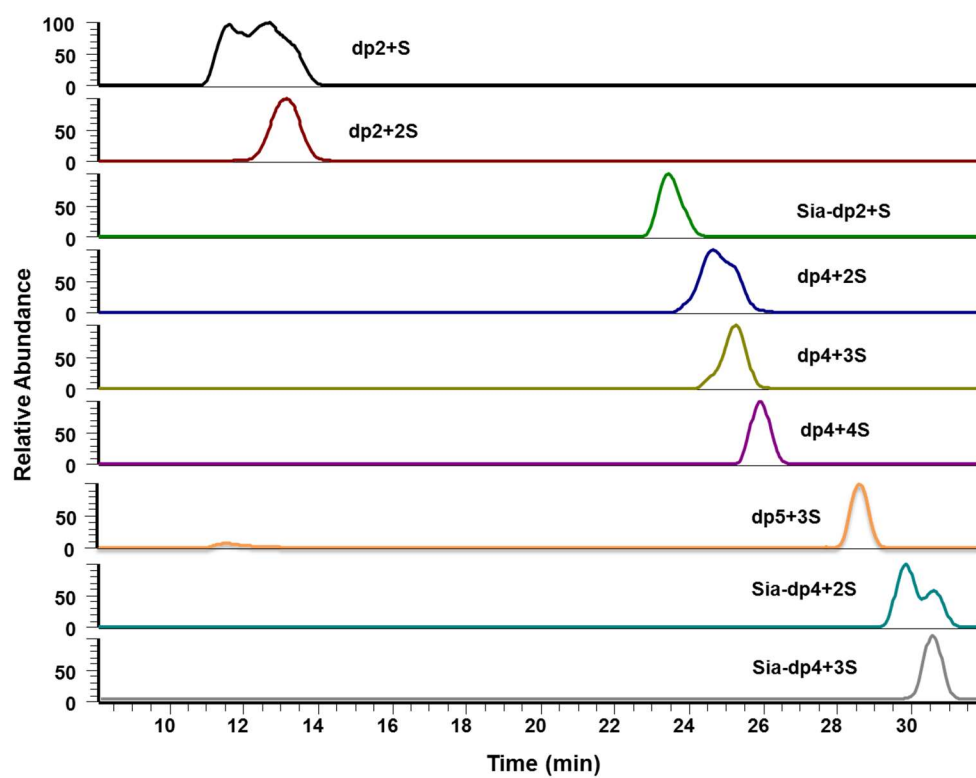

**Figure S4.** The extracted ion chromatograms (EICs) of KSO based on HILIC-MS analysis.

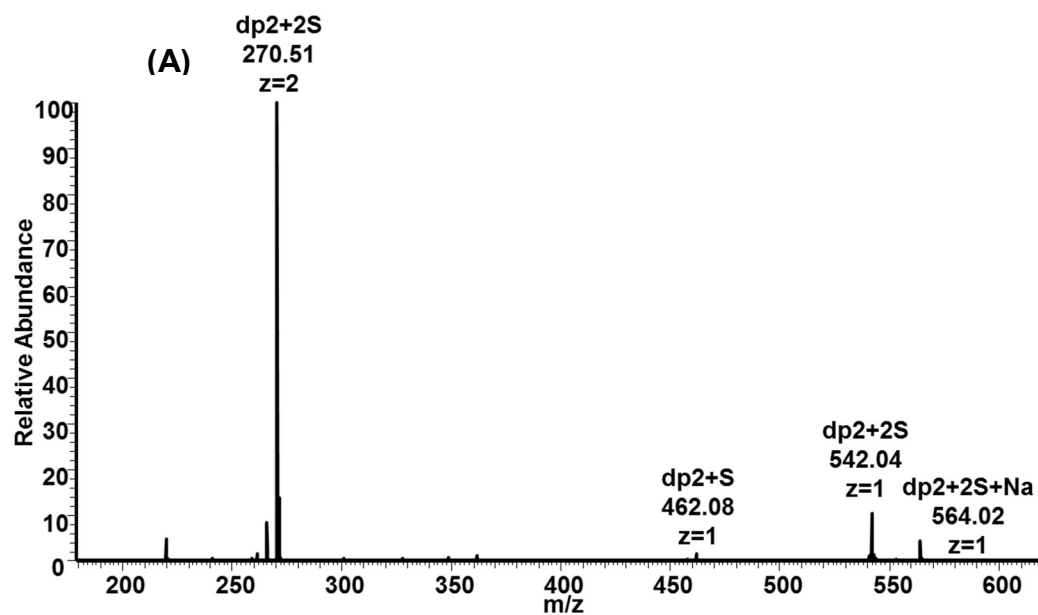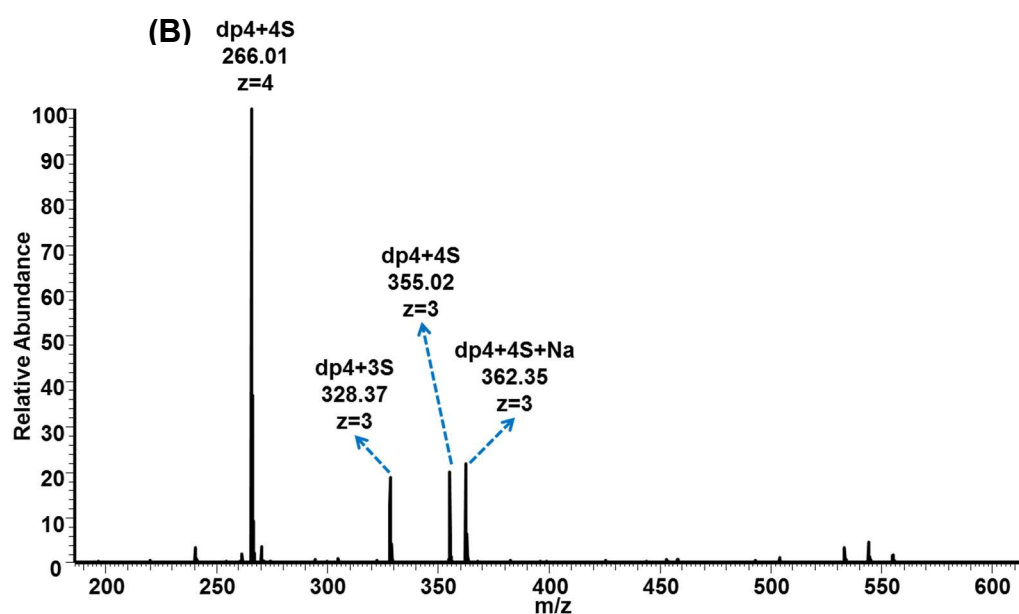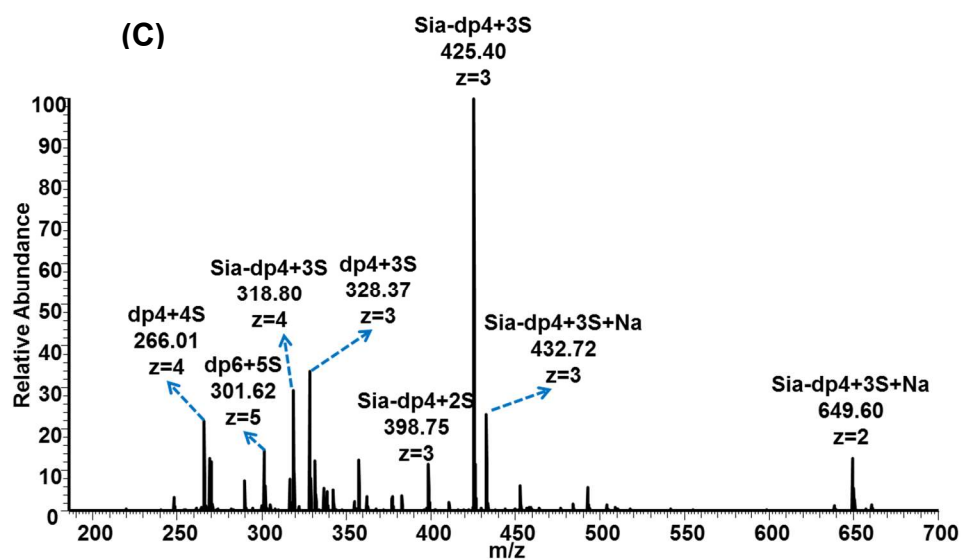

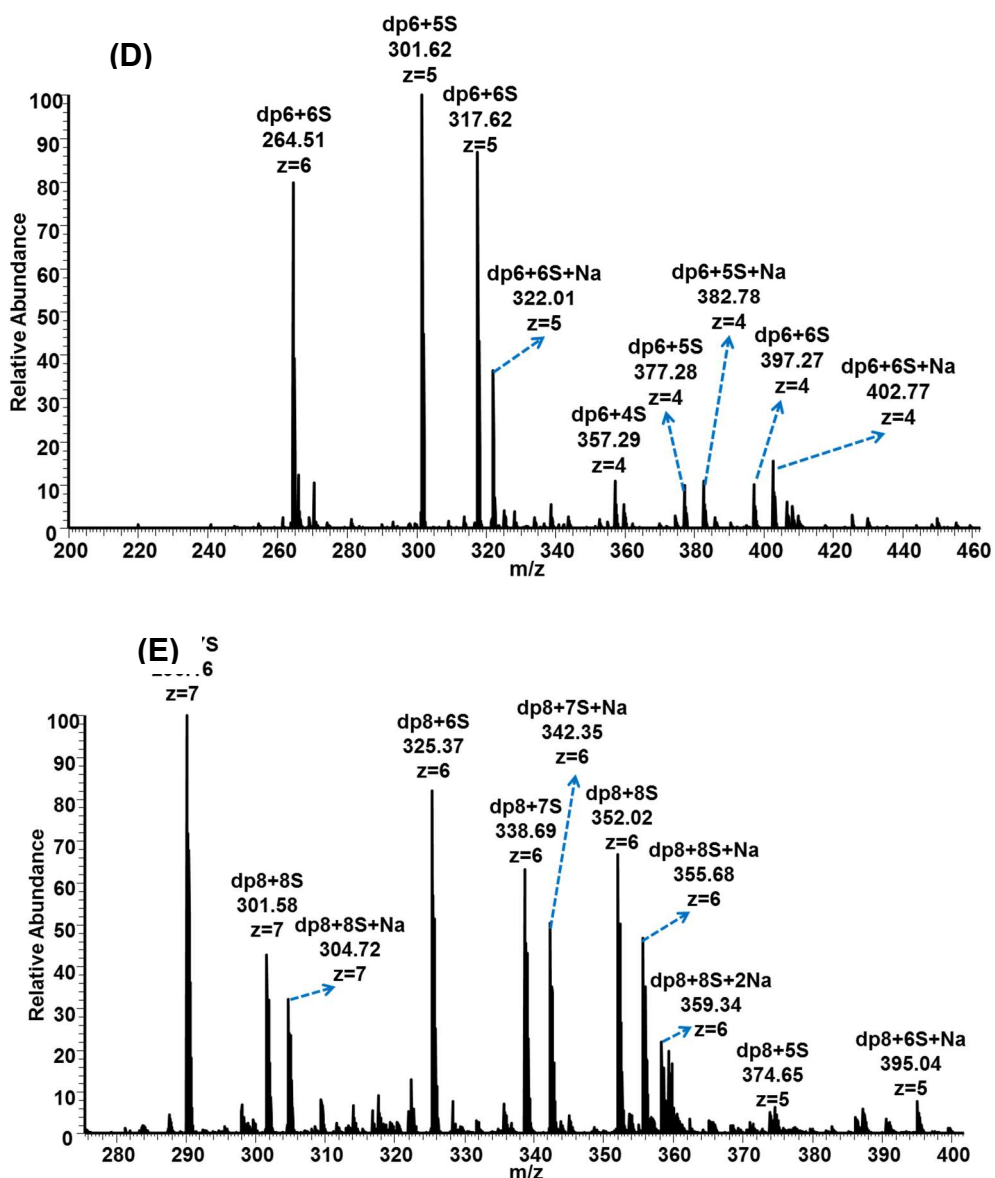

**Figure S5.** Negative-ion mass spectra of KS oligosaccharides isolated by Bio-Gel P6. (A) Fraction 1, dp2; (B) Fraction 2, dp4; (C) Fraction 3, dp5; (D) Fraction 4, dp6; (E) Fraction 5, dp8. “dp” represents degree of polymerization; “S” represents sulfate.

MS<sup>1</sup>.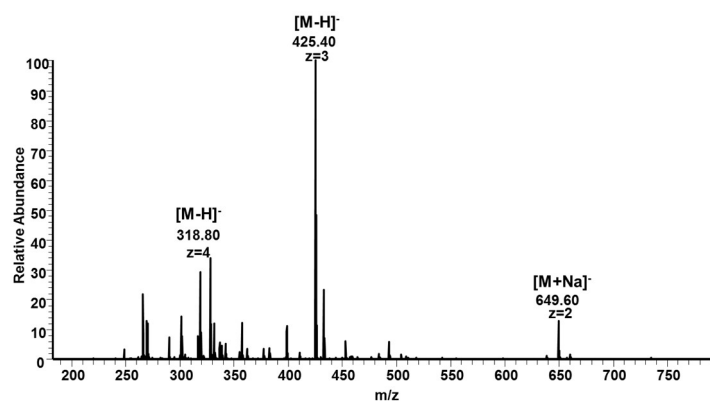

The first structure:

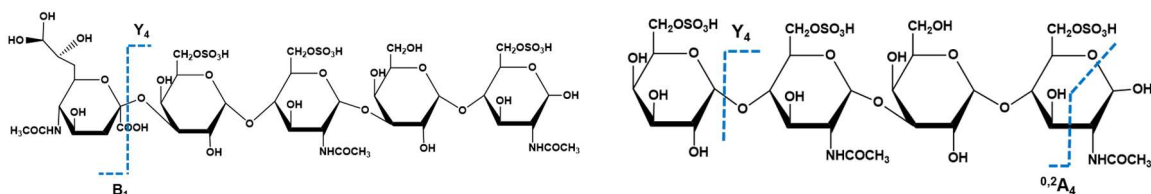MS<sup>2</sup> of 425.40<sup>3-</sup>→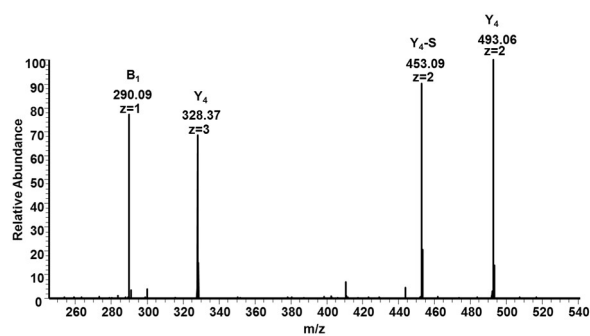MS<sup>3</sup> of 425.40<sup>3-</sup>→328.37<sup>3-</sup>→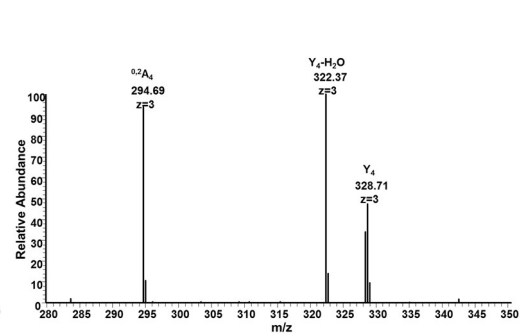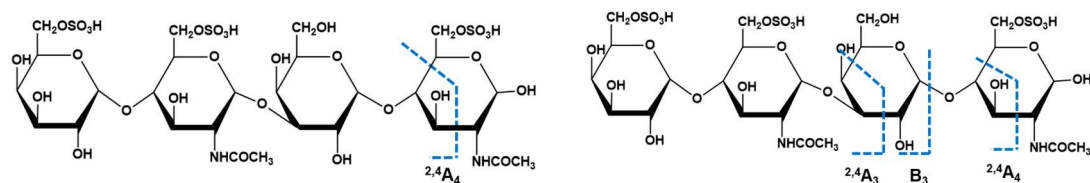MS<sup>4</sup> of 425.40<sup>3-</sup>→328.37<sup>3-</sup>→294.69<sup>3-</sup>→MS<sup>5</sup> of 425.40<sup>3-</sup>→328.37<sup>3-</sup>→294.69<sup>3-</sup>→372.55<sup>2-</sup>→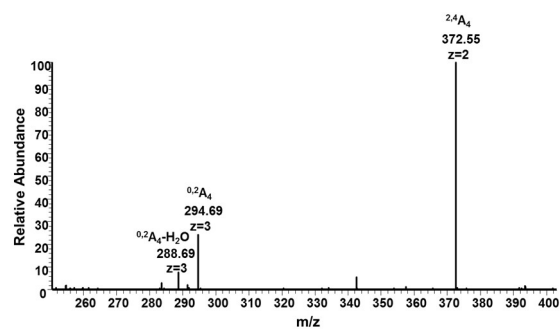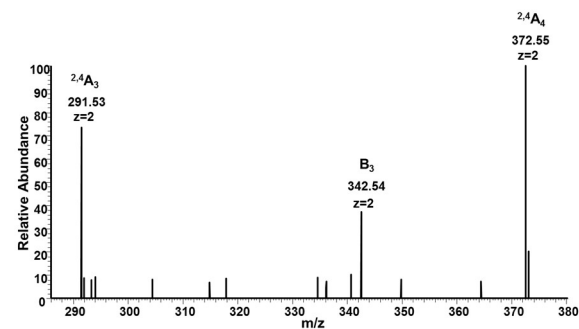

The second structure:

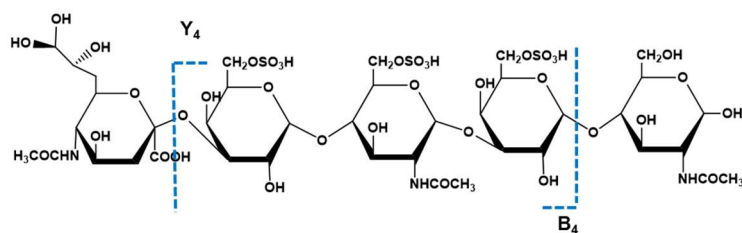

MS<sup>2</sup> of 318.80<sup>3-</sup>→

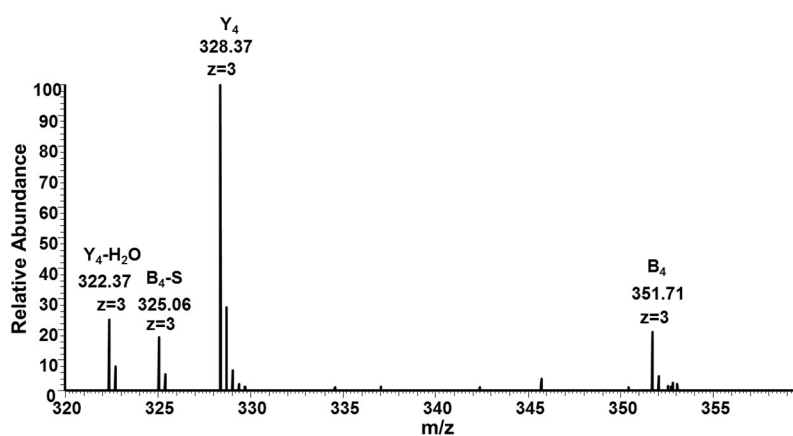

**Figure S6.** Negative-ion ESI-MS<sup>n</sup> product-ion spectra of sialylated KS tetrasaccharide (Sia-dp4+3S) isolated by Bio-Gel P6. “dp” represents degree of polymerization. “S” represents sulfate.
